# Supplementary material for: Synthesis of Fluorescent, Small, Stable and Non-Toxic Epitope-Imprinted Polymer Nanoparticles in Water
Source: MDPI journal article supplement (doi:10.3390/polym15051112), 2023-02-23
Supplement: s1 [file s1]

Supporting information

## Synthesis of fluorescent, small, stable and non-toxic epitope imprinted polymer nanoparticles in water.

Perla Benghouzi <sup>1</sup>, Lila Louadj <sup>1,2</sup>, Maylis Garnier <sup>1,2</sup>, Aurélia Pagani <sup>1,2</sup>, Jérôme Fresnais <sup>1</sup>, Carlo Gonzato <sup>3</sup>, Michèle Sabbah <sup>2</sup> and Nébéwia Griffete <sup>1,\*</sup>

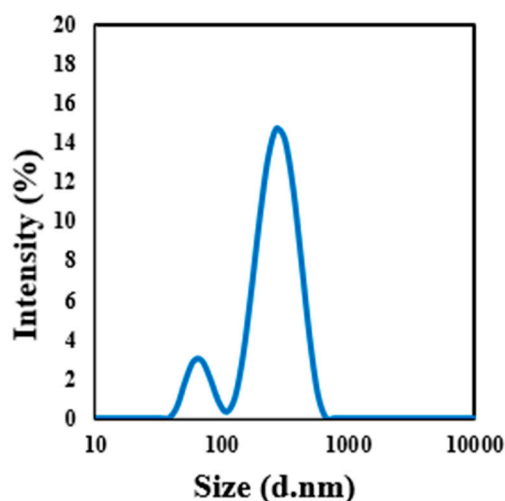

Figure S1. Dynamic light scattering (DLS) of the MIP after two months

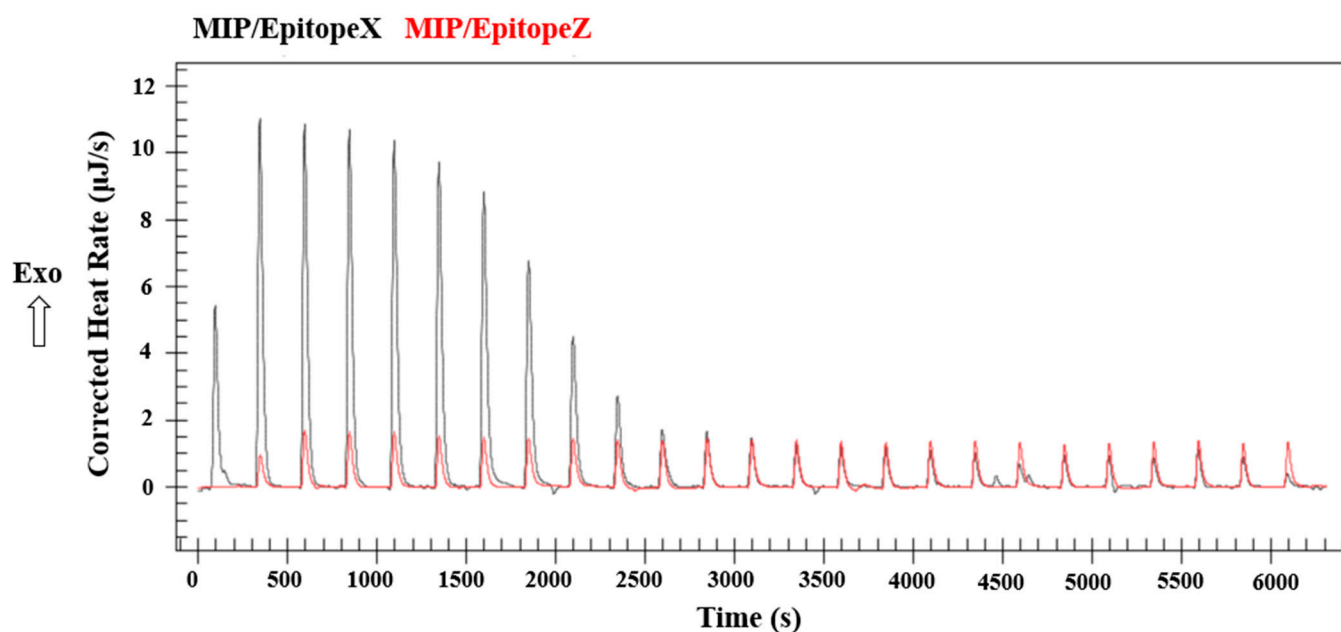

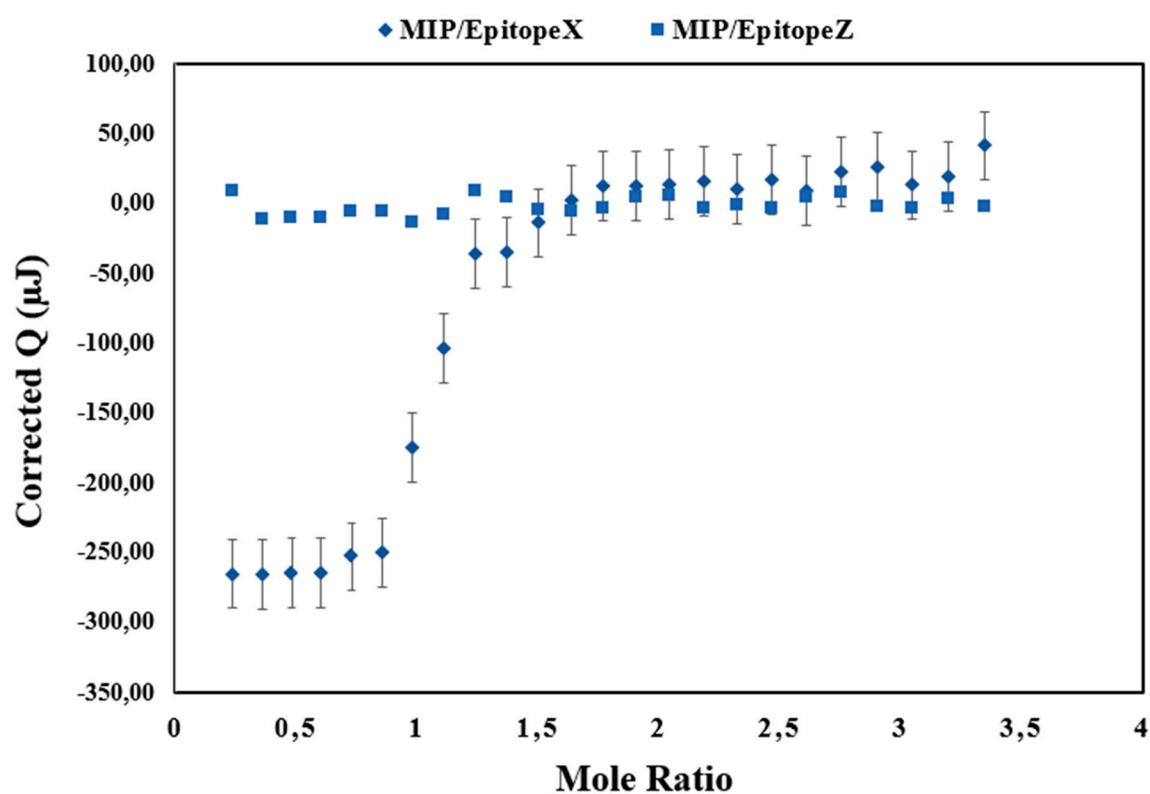

**Figure S2.** Calorimetric data for binding kinetics between MIP/epitope X and the MIP with another epitope Z from the same protein. Top: raw data from exothermic binding after continuous titration of MIP in epitope solution. Bottom: results calculated from the raw data as a function of the molar ratio of MIP to epitope (the first value was excluded from analyze).
